# Supplementary material
Source: HighWire-hosted journal article supplement (https://ard.bmj.com/content/76/10/1642)
Supplement: inline-supplementary-material-1 [file inline-supplementary-material-1.docx]

| **Supplementary table 1. Sensitivity analysis of acute coronary syndrome in patients with DAS28 ≤3.2 at diagnosis and DAS28 >3.2 at diagnosis.** Hazard ratio (HR) and 95% confidence intervals (CI) for acute coronary syndrome adjusted for sex, residential area, year of diagnosis, age and educational level. Overall and stratified by calendar period of RA diagnosis and time since RA diagnosis. | | | | |
| --- | --- | --- | --- | --- |
|  | **RA duration categories**  HR (95% CI) | | | |
| **Calendar period of RA diagnosis** | **<1 year** | **1-<5 years** | **5-10 years** | **>10 years** |
| **Total study period DAS28 ≤3.2 DAS28 >3.2** | 0.52 (0.20-1.32) 1.21 (0.93-1.57) | 0.94 (0.60-1.49) 1.46 (1.27-1.69) | 1.08 (0.53-2.18) 1.59 (1.35-1.88) | 0.38 (0.11-1.31) 1.38 (1.05-1.82) |
| **1997-2002  DAS28 ≤3.2 DAS28 >3.2** | --- 1.25 (0.79-2.00) | 0.68 (0.26-1.76) 1.57 (1.25-1.95) | 0.46 (0.14-1.58) 1.67 (1.34-2.09 ) | 0.29 (0.07-1.27) 1.34 (1.00-1.78) |
| **2003-2006 DAS28 ≤3.2 DAS28 >3.2** | --- 1.23 (0.70-2.14) | 0.84 (0.28-2.51) 1.43 (1.09-1.88) | 4.61 (1.24-17.14) 1.49 (1.13-1.97) | 1.40 (0.08-25.17) 1.99 (0.80-4.96) |
| **2007-2010 DAS28 ≤3.2 DAS28 >3.2** | 1.28 (0.42-3.89) 1.31 (0.78-2.18) | 1.17 (0.57-2.39 ) 1.39 (1.04-1.84) | 0.90 (0.17-4.66 ) 1.51 (0.87-2.64 ) | . (.-. ) --- |
| **2011-2014 DAS28 ≤3.2 DAS28 >3.2** | 0.38 (0.05-2.90) 1.02 (0.57-1.83) | 1.08 (0.36-3.26) 1.31 (0.78-2.21) | . (.-. ) --- | . (.-. ) --- |

| **Supplementary table 2. Sensitivity analysis of acute coronary syndrome in patients with rheumatoid factor (RF) positive and RF negative rheumatoid arthritis.** Hazard ratio (HR) and 95% confidence intervals (CI) for acute coronary syndrome adjusted for sex, residential area, year of diagnosis, age and educational level. Overall and stratified by calendar period of RA diagnosis and time since RA diagnosis. | | | | |
| --- | --- | --- | --- | --- |
|  | **RA duration categories**  HR (95% CI) | | | |
| **Calendar period of RA diagnosis** | **<1 year** | **1-<5 years** | **5-10 years** | **>10 years** |
| **Total study period RF positive  RF negative** | 1.51 (1.14-2.01) 0.63 (0.39-1.00) | 1.50 (1.27-1.77) 1.34 (1.09-1.64) | 1.98 (1.63-2.40) 1.07 (0.82-1.40) | 1.58 (1.16-2.16) 0.90 (0.57-1.41) |
| **1997-2002  RF positive  RF negative** | 1.36 (0.80-2.30) 0.77 (0.35-1.72) | 1.58 (1.22-2.05) 1.28 (0.90-1.82) | 1.82 (1.39-2.38) 1.33 (0.95-1.85) | 1.57 (1.14-2.16) 0.79 (0.48-1.30) |
| **2003-2006 RF positive  RF negative** | 1.74 (0.99-3.07) 0.45 (0.14-1.47) | 1.48 (1.06-2.07) 1.40 (0.96-2.04) | 2.05 (1.50-2.80) 0.85 (0.53-1.39) | 1.76 (0.44-7.11) 1.77 (0.60-5.21) |
| **2007-2010 RF positive  RF negative** | 1.93 (1.10-3.37) 0.62 (0.28-1.40) | 1.43 (1.05-1.95) 1.34 (0.90-1.98) | 2.59 (1.46-4.59) 0.56 (0.21-1.49) | - |
| **2011-2014 RF positive  RF negative** | 1.19 (0.66-2.15) 0.62 (0.22-1.78) | 1.45 (0.83-2.53) 1.35 (0.66-2.76) | - | - |
